# Supplementary material for: The use of ionic liquids in the synthesis of zinc imidazolate frameworks
Source: Royal Society of Chemistry journal article supplement (doi:10.1039/b917348j), 2009-12-22

## **The use of ionic liquids in the synthesis of zinc imidazole frameworks**

**Gesley A. V. Martins,<sup>1</sup> Peter J. Byrne,<sup>1</sup> Phoebe Allan,<sup>1</sup> Simon J. Teat,<sup>2</sup> Alexandra M. Z. Slawin,<sup>1</sup> Yang Li<sup>1</sup> and Russell E. Morris<sup>1,\*</sup>**

### **Supplementary material**

#### Section 1. Experimental PXRD Patterns

Table S1. Comparison of positions and indices of diffraction lines in the experimental and simulated PXRD patterns of sample 2.

| Observed PXRD |       | Simulated PXRD |       | Indices |
|---------------|-------|----------------|-------|---------|
| 2-Theta       | d (Å) | 2-Theta        | d (Å) | hkl     |
| 13.96         | 6.33  | 14.05          | 6.29  | 110     |
| 15.26         | 5.79  | 15.42          | 5.74  | 011     |
| 16.13         | 5.48  | 16.12          | 5.49  | 200     |
| 20.47         | 4.33  | 20.53          | 4.32  | 002     |
| 22.27         | 3.98  | 22.38          | 3.96  | 211     |
| 24.82         | 3.58  | 24.97          | 3.56  | 112     |
| 26.29         | 3.38  | 26.64          | 3.34  | 121     |
| 32.57         | 2.74  | 32.57          | 2.74  | 400     |
| 32.99         | 2.71  | 33.18          | 2.69  | 013     |
| 34.01         | 2.63  | 34.12          | 2.62  | 312     |

Figure S1 Experimental PXRD pattern of sample 2.

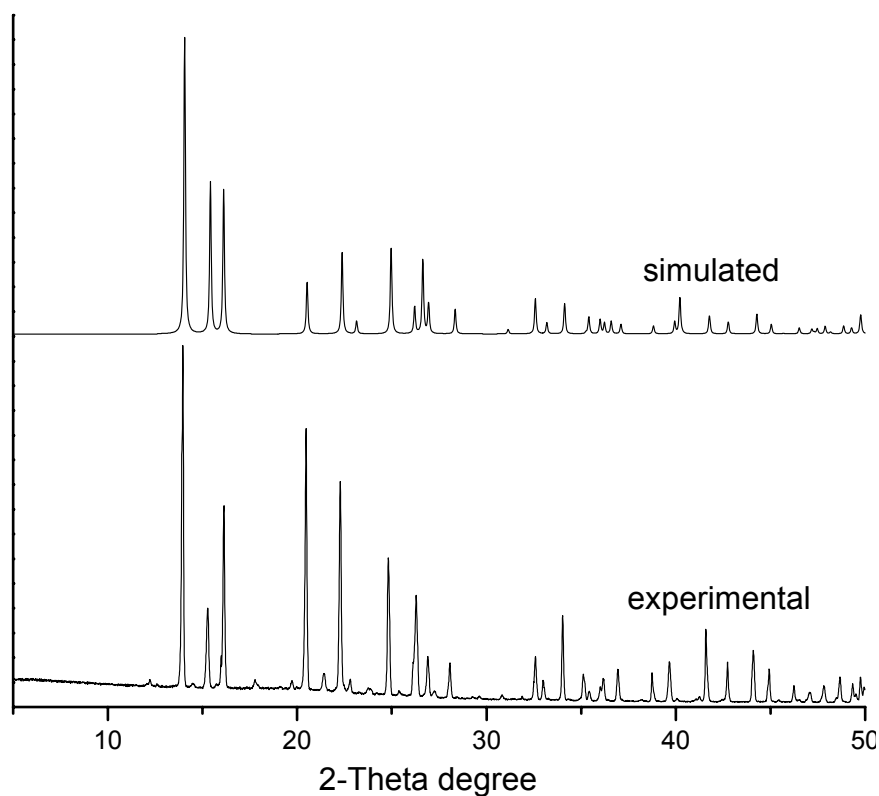

Table S2. Comparison of positions and indices of diffraction lines in the experimental and simulated PXRD patterns of sample 3.

| Observed PXRD |       | Simulated PXRD |       | Indices<br>hkl |
|---------------|-------|----------------|-------|----------------|
| 2-Theta       | d (Å) | 2-Theta        | d (Å) |                |
| 6.03          | 14.63 | 6.01           | 14.68 | 001            |
| 7.18          | 12.29 | 7.18           | 12.29 | 010            |
| 12.06         | 7.32  | 12.42          | 7.34  | 002            |
| 14.08         | 6.28  | 14.16          | 6.24  | 11-1           |
| 14.84         | 5.96  | 14.87          | 5.95  | 10-2           |
| 15.09         | 5.86  | 15.04          | 5.88  | 012            |
| 15.85         | 5.58  | 15.83          | 5.59  | 102            |
| 16.36         | 5.41  | 16.39          | 5.40  | 1-2-1          |
| 16.88         | 5.24  | 16.97          | 5.21  | 11-2           |
| 18.99         | 4.66  | 19.08          | 4.64  | 2-11           |
| 19.80         | 4.48  | 19.93          | 4.45  | 10-3           |
| 21.02         | 4.22  | 21.21          | 4.18  | 11-3           |
| 21.41         | 4.14  | 21.50          | 4.12  | 03-1           |

Figure S2. Experimental PXRD pattern of sample 3

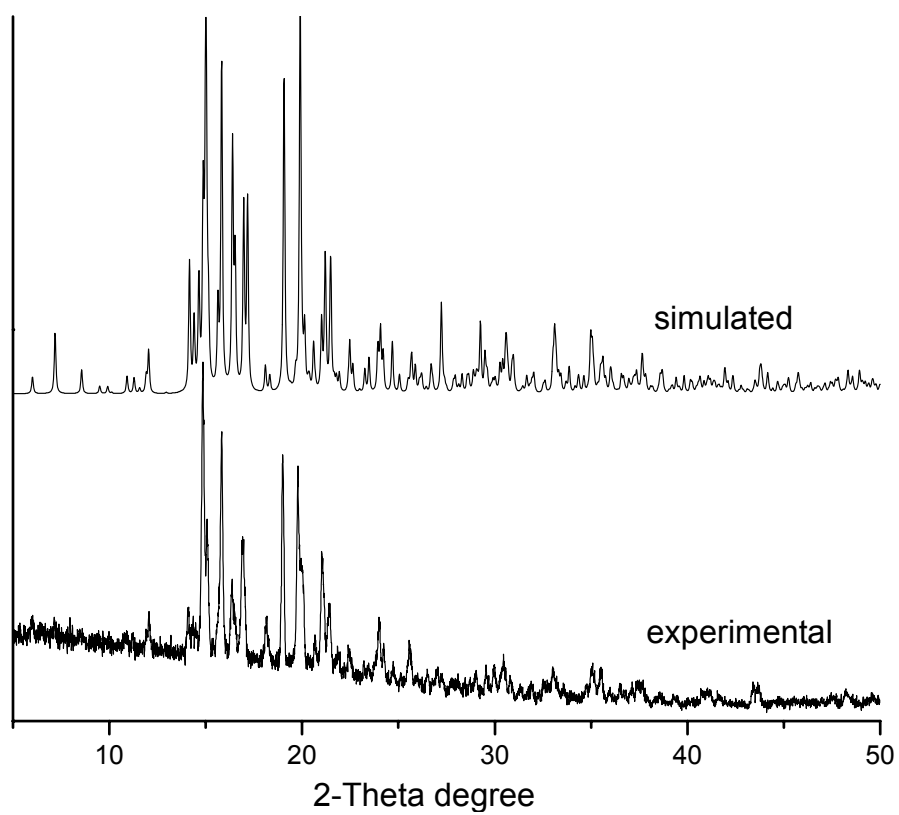

Supplement: b917348j.pdf [file b917348j.pdf]
